# Supplementary material for: Responses of Fungal Assembly and Co-Occurrence Network of Rhizosphere Soil to Amaranthus palmeri Invasion in Northern China
Source: MDPI journal article supplement (doi:10.3390/jof9050509), 2023-04-25
Supplement: s1 [file s1]

# Responses of Fungal Assembly and Co-Occurrence Network of Rhizosphere Soil to *Amaranthus palmeri* Invasion in Northern China

Mei Zhang <sup>1</sup>, Kefan Wang <sup>1</sup>, Cong Shi <sup>2</sup>, Xueying Li <sup>1</sup>, Zhenlu Qiu <sup>1</sup> and Fuchen Shi <sup>1,\*</sup>

<sup>1</sup> Department of Plant Biology and Ecology, College of Life Sciences, Nankai University, Tianjin 300071, China

<sup>2</sup> School of Environmental Science and Engineering, Tiangong University, Tianjin 300387, China

\* Correspondence: fcshi@nankai.edu.cn; Tel.: +86-22-23502477

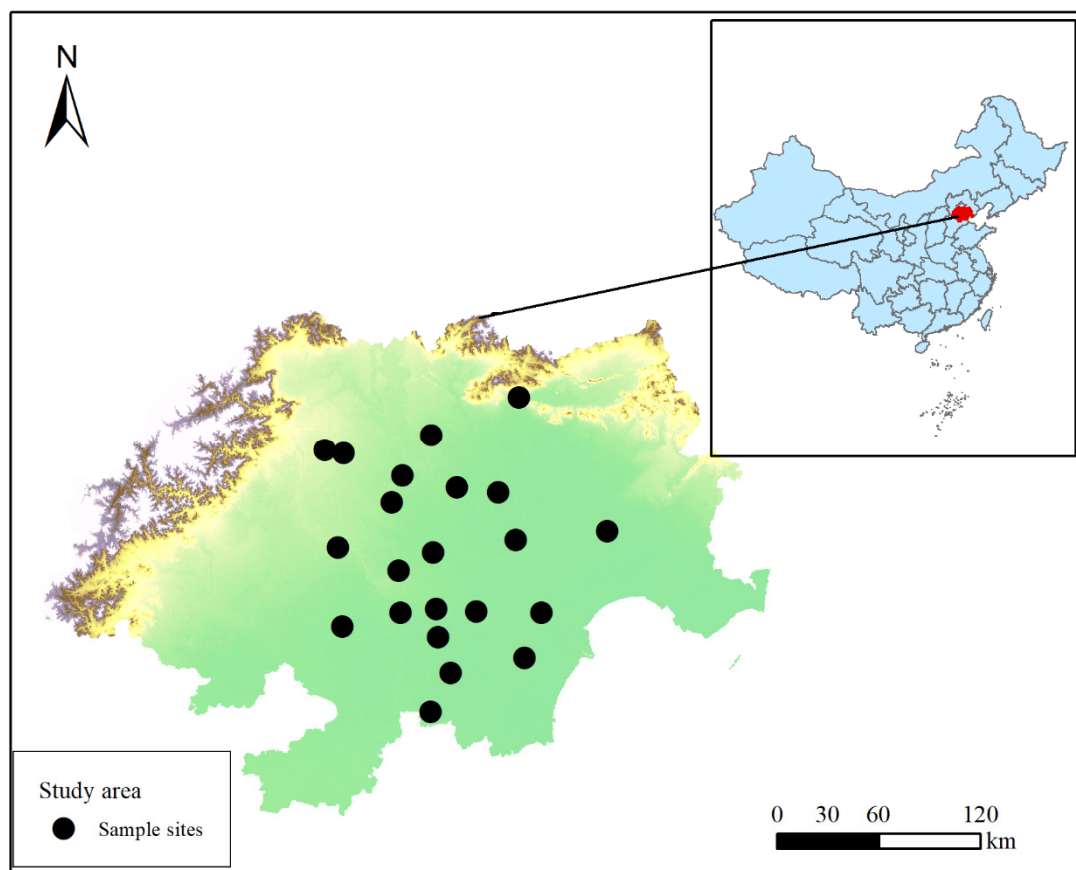

**Figure S1.** Location of the study area and sample sites.

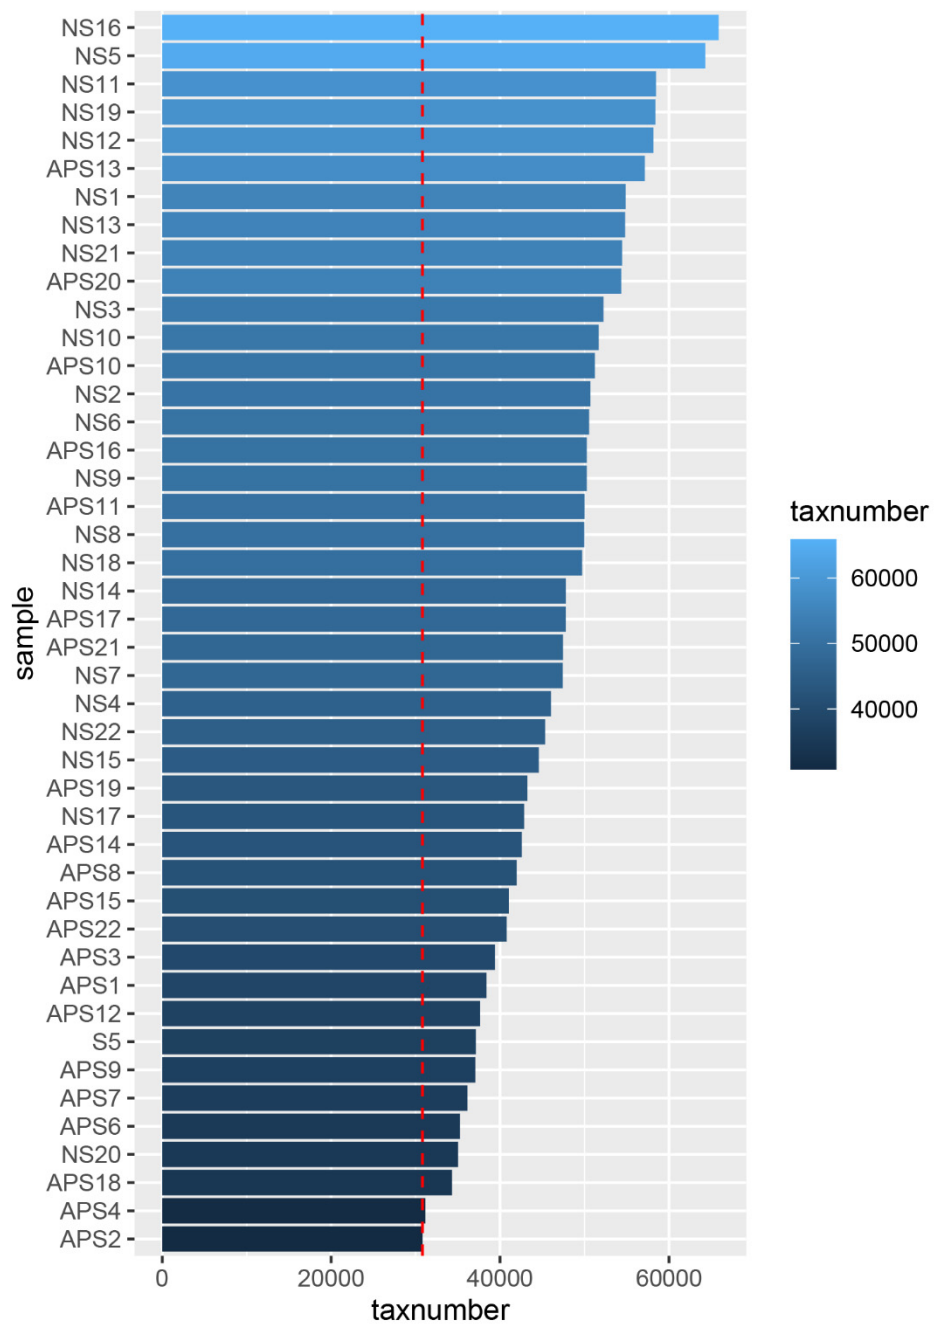

**Figure S2.** The rarefaction curve of 22 samples.

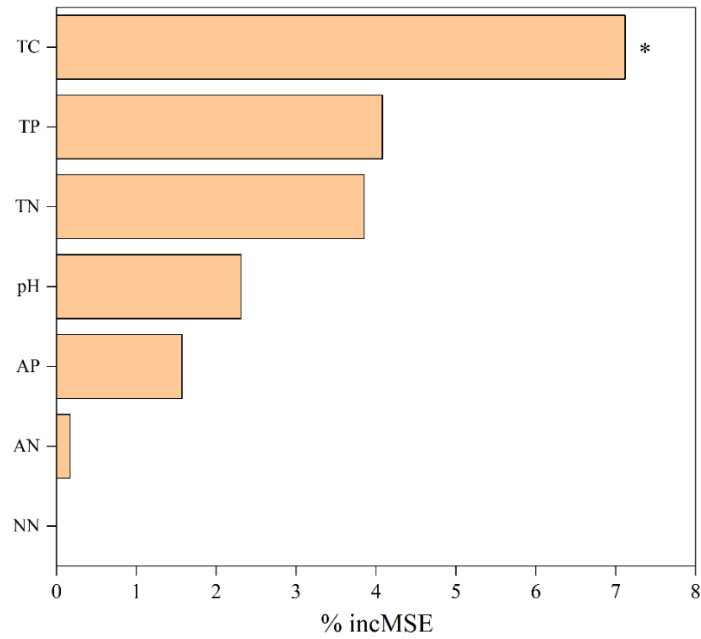

**Figure S3.** Main soil factors affecting keystone taxa characterized by random forest modeling analysis. The figure shows the random forest analysis results with primary predictor importance (i.e., the percent increase in mean square error (%IncMSE)). \*  $p < 0.05$ . Abbreviation: TN, total nitrogen; TC, total carbon; TP, total phosphorus; AN, ammonium nitrogen; NN, nitrate nitrogen; AP, available phosphorus.

**Table S1** Vegetation characteristics of the 22 sampling sites.

| Site | Province | Dominant accompanying species in invasive patches    | Dominant species in native patches                                                                                                                 |
|------|----------|------------------------------------------------------|----------------------------------------------------------------------------------------------------------------------------------------------------|
| 1    | Tianjin  | <i>Chloris virgata</i> ,<br><i>Salsola collina</i>   | <i>Phragmites australis</i> , <i>Digitaria sanguinalis</i> , <i>Chloris virgata</i> , <i>Artemisia lavandulifolia</i> , <i>Chenopodium glaucum</i> |
| 2    | Tianjin  | <i>Setaria viridis</i> ,<br><i>Chenopodium album</i> | <i>Setaria viridis</i> , <i>Suaeda glauca</i>                                                                                                      |
| 3    | Tianjin  | <i>Amaranthus viridis</i>                            | <i>Setaria viridis</i> , <i>Amaranthus viridis</i> , <i>Abutilon theophrasti</i> , <i>Xanthium sibiricum</i>                                       |
| 4    | Tianjin  | <i>Setaria viridis</i>                               | <i>Setaria viridis</i> , <i>Digitaria sanguinalis</i> , <i>Amaranthus viridis</i> ,<br><i>Chenopodium album</i>                                    |
| 5    | Tianjin  | <i>Portulaca oleracea</i>                            | <i>Setaria viridis</i> , <i>Artemisia lavandulifolia</i>                                                                                           |
| 6    | Tianjin  | <i>Portulaca oleracea</i>                            | <i>Setaria viridis</i> , <i>Chenopodium album</i> , <i>Suaeda glauca</i> , <i>Portulaca oleracea</i>                                               |
| 7    | Tianjin  | <i>Setaria viridis</i>                               | <i>Amaranthus viridis</i> , <i>Xanthium strumarium</i>                                                                                             |
| 8    | Tianjin  | <i>Portulaca oleracea</i>                            | <i>Chenopodium album</i> , <i>Setaria viridis</i>                                                                                                  |
| 9    | Tianjin  | <i>Setaria viridis</i>                               | <i>Kochia scoparia</i> , <i>Setaria viridis</i>                                                                                                    |
| 10   | Tianjin  | <i>Chloris virgata</i>                               | <i>Artemisia scoparia</i> , <i>Kochia scoparia</i> , <i>Setaria viridis</i> , <i>Digitaria sanguinalis</i> , <i>Chloris virgata</i>                |
| 11   | Tianjin  | <i>Digitaria sanguinalis</i>                         | <i>Kochia scoparia</i> , <i>Setaria viridis</i> , <i>Digitaria sanguinalis</i> , <i>Chloris virgata</i>                                            |
| 12   | Tianjin  | <i>Eleusine indica</i>                               | <i>Kochia scoparia</i> , <i>Echinochloa crusgalli</i> , <i>Digitaria sanguinalis</i> , <i>Eleusine indica</i> , <i>Chloris virgata</i>             |
| 13   | Hebei    | <i>Chenopodium album</i>                             | <i>Abutilon theophrasti</i> , <i>Chenopodium album</i> , <i>Digitaria sanguinalis</i>                                                              |
| 14   | Hebei    | <i>Setaria viridis</i>                               | <i>Amaranthus viridis</i> , <i>Setaria viridis</i> , <i>Kochia scoparia</i>                                                                        |

|    |         |                           |                                                                                            |
|----|---------|---------------------------|--------------------------------------------------------------------------------------------|
| 15 | Hebei   | <i>Eleusine indica</i>    | <i>Xanthium strumarium, Eleusine indica</i>                                                |
| 16 | Beijing | <i>Setaria viridis</i>    | <i>Xanthium strumarium, Setaria viridis, Eleusine indica</i>                               |
| 17 | Beijing | <i>Kochia scoparia</i>    | <i>Kochia scoparia, Setaria viridis</i>                                                    |
| 18 | Beijing | <i>Setaria viridis</i>    | <i>Chenopodium album, Setaria viridis, Abutilon theophrasti</i>                            |
| 19 | Hebei   | <i>Eleusine indica</i>    | <i>Xanthium strumarium, Eleusine indica, Setaria viridis</i>                               |
| 20 | Hebei   | <i>Chenopodium album</i>  | <i>Chenopodium album, Digitaria sanguinalis, Abutilon theophrasti,<br/>Setaria viridis</i> |
| 21 | Hebei   | <i>Amaranthus viridis</i> | <i>Setaria viridis, Eleusine indica, Digitaria sanguinalis, Amaranthus<br/>viridis</i>     |
| 22 | Hebei   | <i>Eleusine indica</i>    | <i>Eleusine indica, Chloris virgata, Echinochloa crusgalli</i>                             |

**Table S2** Major topological properties of fungal networks in *A. palmeri* (AP) and native (N) rhizosphere soils.

| network                | AP     | N      |
|------------------------|--------|--------|
| node number            | 401    | 389    |
| edge number            | 814    | 817    |
| net average degree     | 4.06   | 4.20   |
| net positive           | 567    | 574    |
| net negative           | 247    | 243    |
| edge density           | 0.0101 | 0.0108 |
| net diameter           | 12     | 12     |
| clustering coefficient | 0.180  | 0.216  |
| Average path length    | 4.89   | 4.93   |
| Assortativity          | 0.2537 | 0.3897 |
| net degree centrality  | 0.0273 | 0.0329 |
| average neighbors      | 5.34   | 5.53   |
| net modularity         | 0.635  | 0.619  |
| HarMonicGeoDis         | 10.69  | 9.10   |
| r2.power.law           | 0.727  | 0.814  |

**Table S3** Relative abundance and difference test of keystone taxa in *A. palmeri* (AP) and native(N) rhizosphere soils. \*\* $p < 0.01$ , \*  $p < 0.05$ .

| Invaded         | Genus                     | Family                    | Phyla                | AP               | N                | P          |
|-----------------|---------------------------|---------------------------|----------------------|------------------|------------------|------------|
| OTU_102         | ——                        | ——                        | Ascomycota           | 0.001152         | 0.001572         | ns         |
| OTU_114         | <i>Saitozyma</i>          | Trimorphomycetaceae       | Basidiomycota        | 0.001484         | 0.001466         | ns         |
| OTU_128         | <i>Mortierella</i>        | Mortierellaceae           | Mortierellomycota    | 0.002440         | 0.002577         | ns         |
| OTU_133         | ——                        | ——                        | Ascomycota           | 0.006608         | 0.002450         | ns         |
| <b>OTU_136</b>  | <b><i>Alternaria</i></b>  | <b>Mortierellaceae</b>    | <b>Ascomycota</b>    | <b>0.000615b</b> | <b>0.001898a</b> | <b>**</b>  |
| <b>OTU_137</b>  | <b><i>Colacogloea</i></b> | <b>Microbotryomycetes</b> | <b>Basidiomycota</b> | <b>0.002031a</b> | <b>0.000845b</b> | <b>*</b>   |
| OTU_143         | <i>Cephalotrichum</i>     | Microascaceae             | Ascomycota           | 0.004725         | 0.001975         | ns         |
| OTU_145         | ——                        | ——                        | Ciliophora           | 0.000127         | 0.000103         | ns         |
| OTU_1561        | ——                        | Glomeraceae               | Glomeromycota        | 0.000055         | 0.000127         | ns         |
| <b>OTU_1765</b> | ——                        | ——                        | <b>Ascomycota</b>    | <b>0.001376a</b> | <b>0.000727b</b> | <b>*</b>   |
| OTU_181         | ——                        | ——                        | k:Fungi              | 0.001151         | 0.000996         | ns         |
| OTU_185         | unidentified              | unidentified              | Ascomycota           | 0.000395         | 0.001764         | ns         |
| OTU_2051        | ——                        | ——                        | Ascomycota           | 0.000245         | 0.000417         | ns         |
| OTU_2110        | <i>Myrmecridium</i>       | Myrmecridiaceae           | Ascomycota           | 0.000214         | 0.000189         | ns         |
| OTU_23          | <i>unidentified</i>       | unidentified              | Ascomycota           | 0.006816         | 0.007427         | ns         |
| OTU_2465        | ——                        | unidentified              | k:Fungi              | 0.001022         | 0.000836         | ns         |
| OTU_259         | ——                        | unidentified              | k:Alveolata          | 0.000645         | 0.000313         | ns         |
| OTU_2600        | ——                        | unidentified              | Basidiomycota        | 0.001235         | 0.000354         | ns         |
| OTU_272         | <i>Podospora</i>          | Lasiosphaeriaceae         | Ascomycota           | 0.000308         | 0.000978         | ns         |
| OTU_2720        | <i>Nigrospora</i>         | Trichosphaeriaceae        | Ascomycota           | 0.000117         | 0.000108         | ns         |
| OTU_283         | <i>Gibellulopsis</i>      | Plectosphaerellaceae      | Ascomycota           | 0.000502         | 0.000468         | ns         |
| OTU_30          | <i>Rhizopus</i>           | Rhizopodaceae             | Mucoromycetes        | 0.011660         | 0.001876         | ns         |
| OTU_3149        | <i>Stachybotrys</i>       | Stachybotryaceae          | Ascomycota           | 0.000240         | 0.000754         | ns         |
| OTU_324         | <i>unidentified</i>       | Stachybotryaceae          | Ascomycota           | 0.000155         | 0.000574         | ns         |
| OTU_334         | ——                        | ——                        | Fungi                | 0.001252         | 0.000438         | ns         |
| OTU_35          | ——                        | ——                        | Ciliophora           | 0.006566         | 0.004583         | ns         |
| OTU_359         | ——                        | ——                        | Ascomycota           | 0.000625         | 0.000513         | ns         |
| <b>OTU_36</b>   | ——                        | ——                        | <b>Fungi</b>         | <b>0.014287a</b> | <b>0.000219b</b> | <b>***</b> |
| OTU_369         | ——                        | ——                        | Fungi                | 0.000090         | 0.000599         | ns         |
| <b>OTU_370</b>  | ——                        | ——                        | <b>Fungi</b>         | <b>0.000480a</b> | <b>0.000336b</b> | <b>*</b>   |
| OTU_378         | <i>Mortierella</i>        | Mortierellaceae           | Mortierellomycota    | 0.000656         | 0.000807         | ns         |
| OTU_381         | ——                        | ——                        | Alveolata            | 0.000702         | 0.000530         | ns         |
| OTU_388         | ——                        | Chaetomiaceae             | Ascomycota           | 0.000453         | 0.000822         | ns         |
| OTU_409         | ——                        | Spathidiidae              | Ciliophora           | 0.000313         | 0.000559         | ns         |
| OTU_4328        | <i>Bipolaris</i>          | Pleosporaceae             | Ascomycota           | 0.000183         | 0.000140         | ns         |
| OTU_4708        | <i>Aspergillus</i>        | Aspergillaceae            | Ascomycota           | 0.000159         | 0.000235         | ns         |
| OTU_49          | ——                        | ——                        | Fungi                | 0.004587         | 0.001028         | ns         |
| OTU_63          | ——                        | Trichocomaceae            | Ascomycota           | 0.004788         | 0.000161         | ns         |



|                 |                              |                       |                          |                  |                  |          |
|-----------------|------------------------------|-----------------------|--------------------------|------------------|------------------|----------|
| OTU_636         | unidentified                 | Cordycipitaceae       | Ascomycota               | 0.000134         | 0.000220         | ns       |
| OTU_65          | ——                           | ——                    | Fungi                    | 0.001598         | 0.003791         | ns       |
| OTU_656         | <i>Myrothecium</i>           | Stachybotryaceae      | Ascomycota               | 0.000432         | 0.000336         | ns       |
| OTU_75          | ——                           | ——                    | k:Alveolata,p:Ciliophora | 0.000946         | 0.004816         | ns       |
| OTU_751         | <i>Leptospora</i>            | Phaeosphaeriaceae     | Ascomycota               | 0.000167         | 0.000186         | ns       |
| OTU_794         | <i>Phoma</i>                 | Didymellaceae         | Ascomycota               | 0.000133         | 0.000155         | ns       |
| <b>OTU_81</b>   | ——                           | ——                    | <b>Ascomycota</b>        | <b>0.001376b</b> | <b>0.005721a</b> | *        |
| OTU_898         | ——                           | ——                    | Ascomycota               | 0.001968         | 0.002811         | ns       |
| OTU_914         | ——                           | Glomeraceae           | Ascomycota               | 0.000170         | 0.000310         | ns       |
| OTU_923         | ——                           | ——                    | Ascomycota               | 0.000090         | 0.000060         | ns       |
| <b>Native</b>   | <b>Genus</b>                 | <b>Family</b>         | <b>Phyla</b>             | <b>AP</b>        | <b>N</b>         | <b>P</b> |
| OTU_105         | ——                           | ——                    | Basidiomycota            | 0.000083         | 0.003607         | ns       |
| OTU_11          | <i>Hannaella</i>             | Bulleribasidiaceae    | Basidiomycota            | 0.013059         | 0.016335         | ns       |
| OTU_113         | ——                           | unidentified          | k:Protista               | 0.000482         | 0.002106         | ns       |
| OTU_117         | ——                           | Nectriaceae           | Ascomycota               | 0.001353         | 0.002353         | ns       |
| OTU_1229        | ——                           | Lasiosphaeriaceae     | Ascomycota               | 0.000046         | 0.000232         | ns       |
| OTU_126         | <i>Dileptus</i>              | Dileptidae            | k:Alveolata,p:Ciliophora | 0.001332         | 0.001913         | ns       |
| OTU_127         | <i>Myrmecridium</i>          | Myrmecridiaceae       | Ascomycota               | 0.001164         | 0.001391         | ns       |
| <b>OTU_136</b>  | <b><i>Alternaria</i></b>     | <b>Pleosporaceae</b>  | <b>Ascomycota</b>        | <b>0.000615b</b> | <b>0.001898a</b> | **       |
| OTU_150         | ——                           | ——                    | Ascomycota               | 0.001009         | 0.001536         | ns       |
| OTU_156         | ——                           | ——                    | Ascomycota               | 0.001416         | 0.000586         | ns       |
| OTU_186         | <i>Periconia</i>             | Periconiaceae         | Ascomycota               | 0.000866         | 0.001397         | ns       |
| OTU_194         | ——                           | Cordycipitaceae       | Ascomycota               | 0.001922         | 0.001456         | ns       |
| OTU_202         | ——                           | ——                    | Ascomycota               | 0.000372         | 0.001005         | ns       |
| OTU_214         | ——                           | unidentified          | Ascomycota               | 0.000237         | 0.000996         | ns       |
| OTU_224         | ——                           | ——                    | Ascomycota               | 0.000367         | 0.000524         | ns       |
| OTU_227         | <i>Cyphellophora</i>         | Cyphellophoraceae     | Ascomycota               | 0.000419         | 0.000658         | ns       |
| OTU_234         | ——                           | unidentified          | Ascomycota               | 0.000177         | 0.000223         | ns       |
| OTU_24          | ——                           | ——                    | k:Fungi                  | 0.009560         | 0.008542         | ns       |
| OTU_2602        | <i>Clonostachys</i>          | Bionectriaceae        | Ascomycota               | 0.000258         | 0.000394         | ns       |
| <b>OTU_2686</b> | ——                           | ——                    | <b>Ascomycota</b>        | <b>0.001373b</b> | <b>0.003557a</b> | *        |
| OTU_294         | ——                           | unidentified          | k:Fungi                  | 0.000454         | 0.000490         | ns       |
| OTU_297         | <i>Fusariella</i>            | Hypocreales           | Ascomycota               | 0.000108         | 0.000720         | ns       |
| OTU_304         | ——                           | Clavicipitaceae       | Ascomycota               | 0.000288         | 0.000176         | ns       |
| OTU_314         | ——                           | Chaetomiaceae         | Ascomycota               | 0.000587         | 0.000190         | ns       |
| OTU_32          | ——                           | unidentified          | Ascomycota               | 0.003080         | 0.009098         | ns       |
| OTU_37          | ——                           | k:Fungi               | k:Fungi                  | 0.005712         | 0.002924         | ns       |
| <b>OTU_423</b>  | <b><i>Colletotrichum</i></b> | <b>Glomerellaceae</b> | <b>Ascomycota</b>        | <b>0.000355a</b> | <b>0.000311b</b> | *        |
| OTU_452         | ——                           | Helotiaceae           | Ascomycota               | 0.000119         | 0.000353         | ns       |
| <b>OTU_498</b>  | ——                           | ——                    | <b>k:Fungi</b>           | <b>0.002640a</b> | <b>0.000116b</b> | *        |
| OTU_58          | ——                           | ——                    | Mortierellomycota        | 0.006017         | 0.000249         | ns       |
| OTU_613         | ——                           | ——                    | Ascomycota               | 0.000243         | 0.000550         | ns       |
| OTU_624         | ——                           | Dictyosporiaceae      | Ascomycota               | 0.000096         | 0.000218         | ns       |

|         |                      |                      |                   |          |          |    |
|---------|----------------------|----------------------|-------------------|----------|----------|----|
| OTU_72  | ——                   | ——                   | Basidiomycota     | 0.001909 | 0.002146 | ns |
| OTU_77  | <i>Mortierella</i>   | Mortierellaceae      | Mortierellomycota | 0.003890 | 0.003225 | ns |
| OTU_802 | <i>Beauveria</i>     | Cordycipitaceae      | Ascomycota        | 0.000301 | 0.000058 | ns |
| OTU_846 | ——                   | Lasiosphaeriaceae    | Ascomycota        | 0.000130 | 0.000239 | ns |
| OTU_85  | ——                   | ——                   | k:Fungi           | 0.001972 | 0.001940 | ns |
| OTU_898 | ——                   | ——                   | Ascomycota        | 0.001968 | 0.002811 | ns |
| OTU_9   | <i>Lectera</i>       | Plectosphaerellaceae | Ascomycota        | 0.017946 | 0.023066 | ns |
| OTU_97  | <i>Phaeosphaeria</i> | Phaeosphaeriaceae    | Ascomycota        | 0.001640 | 0.001946 | ns |
| OTU_99  | ——                   | ——                   | Ascomycota        | 0.002698 | 0.003053 | ns |
